# Supplementary material
Source: PubMed Central journal article supplement (PMC4128576)

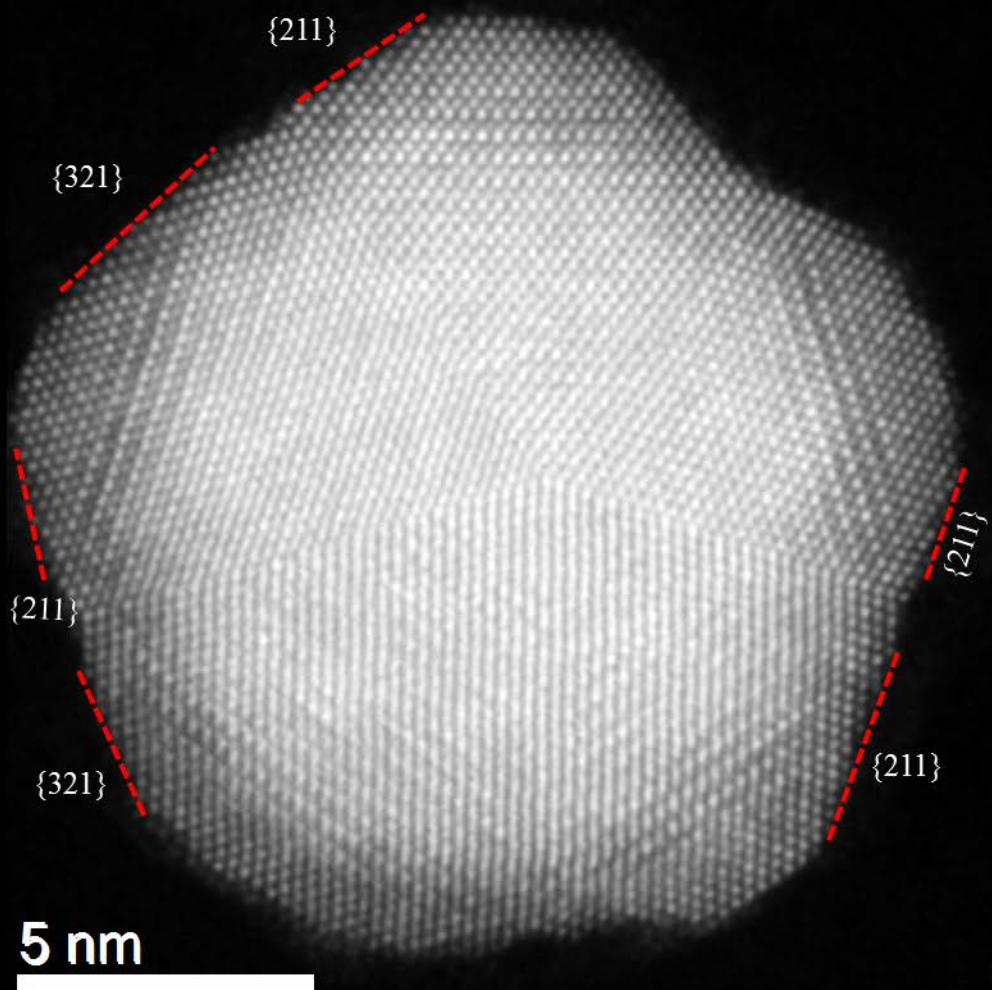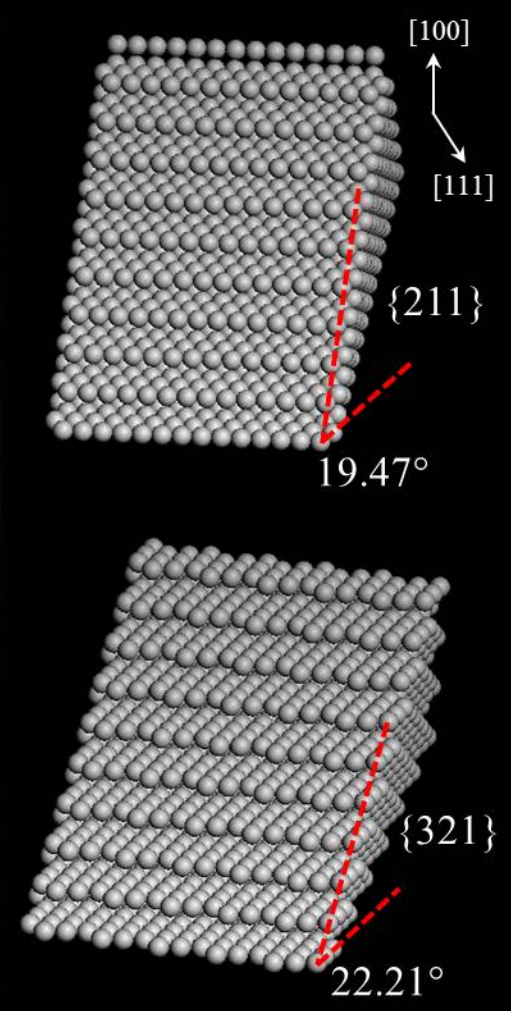

Supplement: NIHMS609900-supplement-Graphical_Abstract.pdf [file NIHMS609900-supplement-Graphical_Abstract.pdf]
